# Supplementary material for: A Molecular network approach reveals shared cellular and molecular signatures between chronic fatigue syndrome and other fatiguing illnesses
Source: PubMed Central journal article supplement — medRxiv. 2021 Feb 2:2021.01.29.21250755. Preprint. [Version 1] doi: 10.1101/2021.01.29.21250755 (PMC7872387; doi:10.1101/2021.01.29.21250755), 2021-02-02
Supplement: NIHPP2021.01.29.21250755-supplement-1.pdf [file NIHPP2021.01.29.21250755-supplement-1.pdf]

# 5-Fold CV

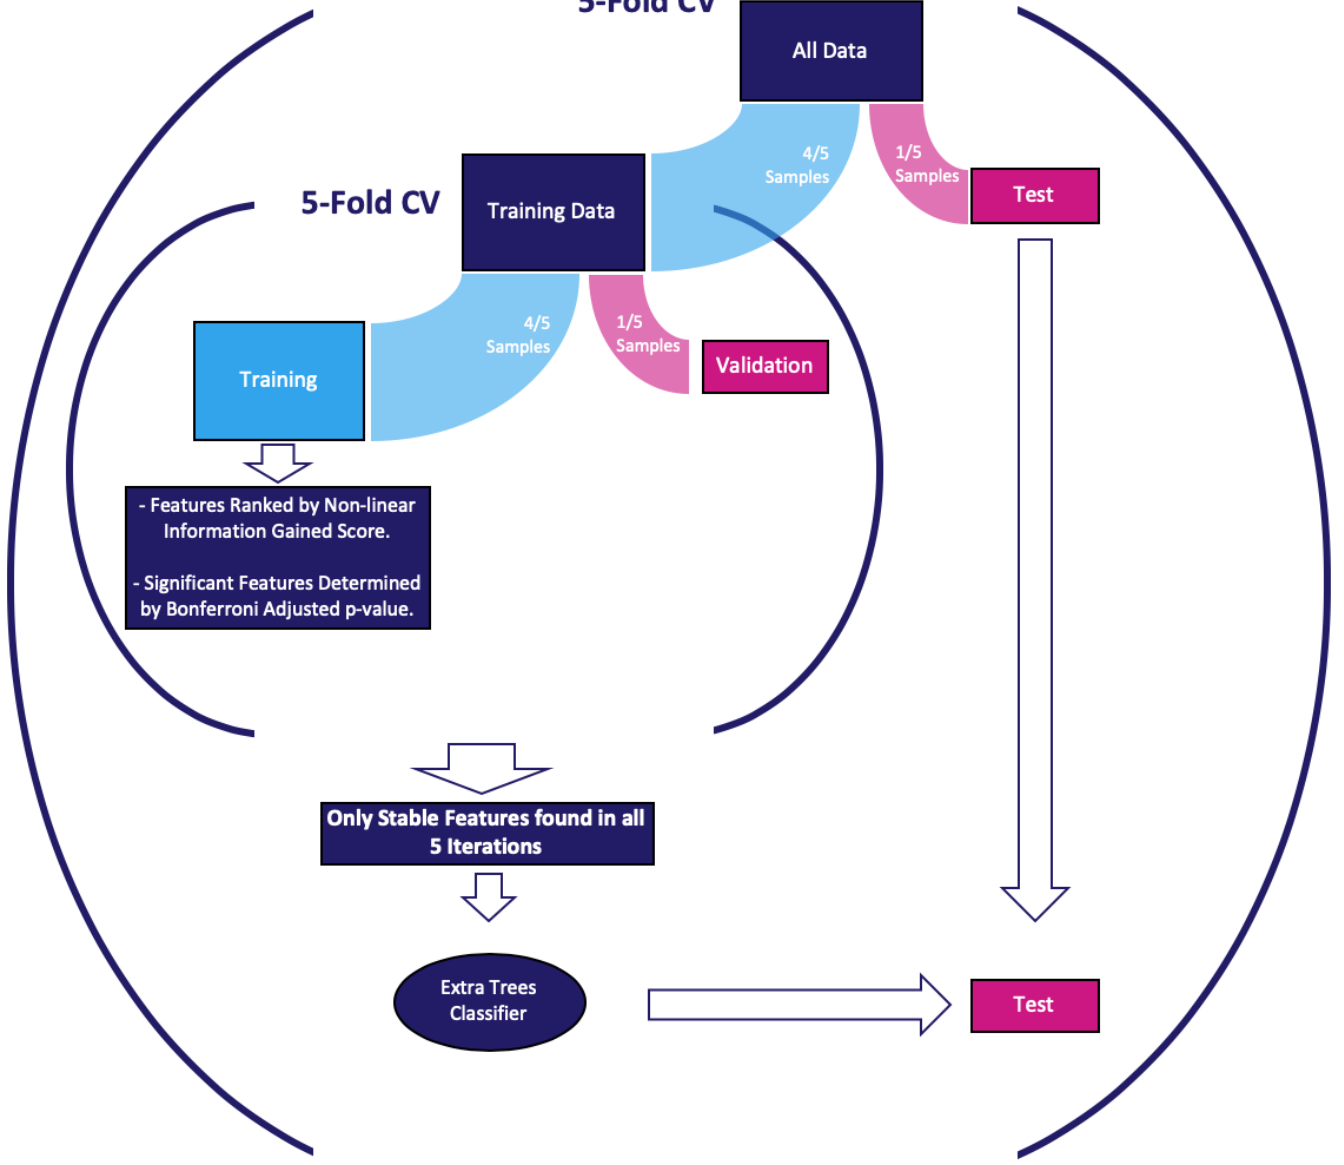

All Data

## 5-Fold CV

Training Data

4/5 Samples

1/5 Samples

Test

Training

4/5 Samples

1/5 Samples

Validation

- Features Ranked by Non-linear Information Gained Score.
- Significant Features Determined by Bonferroni Adjusted p-value.

Only Stable Features found in all 5 Iterations

Extra Trees Classifier

Test

# Scaled density plots for pLI distribution in global KD category

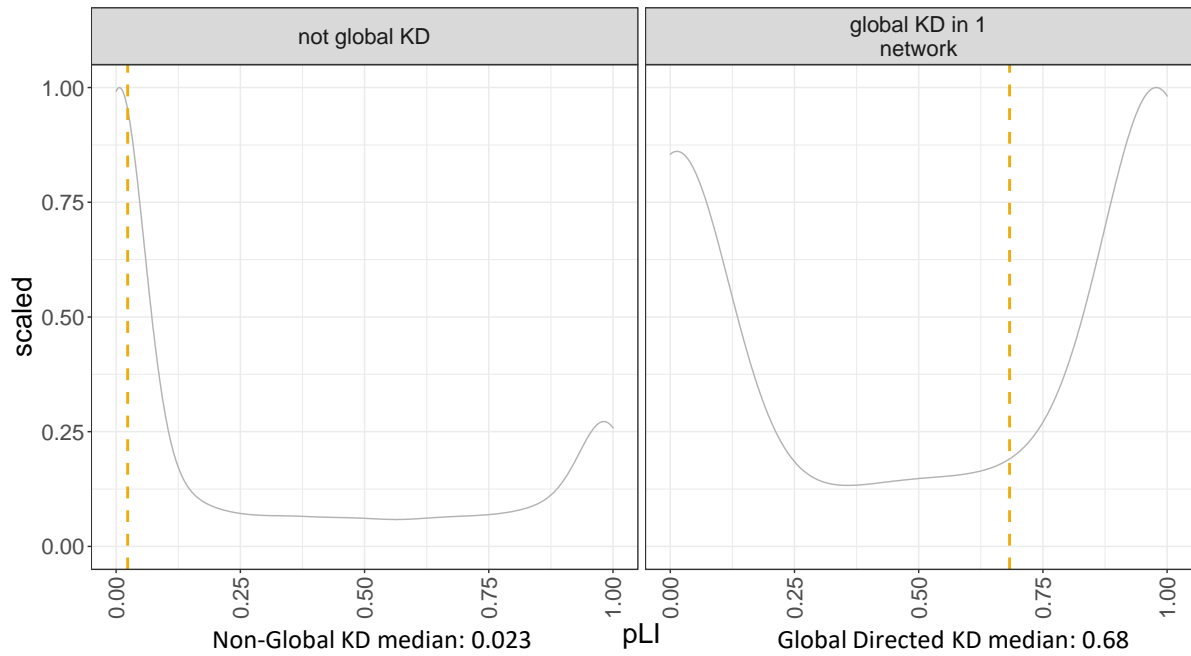

One-Sided Wilcoxon Test p value =  $1.80 \times 10^{-48}$
